# Supplementary material
Source: publisher figshare collection journal article supplement (https://gsapubs.figshare.com/ndownloader/files/22740458)
Supplement: Supplementary file 1 [file 22740458]

## Appendix 1

The computational method used in this paper is adapted from Crouch and Starfield [1983]. We use a version of the boundary element technique that employs constant relative displacement boundary elements.

The technique consists of introducing a series of dislocation elements into an infinite (2- dimensional) elastic medium of appropriate properties. The number, location and amplitude of slip on the elements is then adjusted such that stresses and displacements at boundaries and fault interfaces reasonably approximate those in the real problem being examined.

The problem can be expressed as the solution of the following equations:

$$\begin{aligned} b_s^i - \beta_s^i &= \sum_{j=1}^N C_{ss}^{ij} D_s^j + \sum_{j=1}^N C_{sn}^{ij} D_n^j \\ b_n^i - \beta_n^i &= \sum_{j=1}^N C_{ns}^{ij} D_s^j + \sum_{j=1}^N C_{nn}^{ij} D_n^j \end{aligned} \quad 1)$$

where  $i = 1$  to  $N$ . The  $b_x^i$  are displacements ( $b_x^i = u_x^i$ ) of or stresses ( $b_x^i = \sigma_x^i$ ) on the appropriate side of the  $i$ th boundary element. For normal components  $x = n$  and for shear  $x = s$ . The  $D_x^j$  are normal ( $x = n$ ) or shear ( $x = s$ ) displacements between  $i$ th faces of the  $j$ th boundary element, and the  $C_{xy}^{ij}$  are the influence coefficients between the  $i$ th and  $j$ th elements. Subscripts indicate normal components ( $x$  or  $y = n$ ) and shear ( $x$  or  $y = s$ ) components.

The  $\beta_x^i$  correspond to pre-stresses at the  $i$ th element. In this paper they correspond to stresses due to all elements ( $k = 1$  to  $M$ ) where the normal and tangential displacements ( $B_n^k$  and  $B_s^k$ ) between the faces have been fixed.

$$\begin{aligned}
\beta_s^i &= \sum_{k=1}^M C_{ss}^{ik} B_s^k + \sum_{k=1}^M C_{sn}^{ik} B_n^k \\
\beta_n^i &= \sum_{k=1}^M C_{ns}^{ik} B_s^k + \sum_{k=1}^M C_{nn}^{ik} B_n^k
\end{aligned}
\tag{2}$$

In some cases an element is needed in which one relative slip component is known and the other is sought subject to some requirement (e.g. a fault in which opening or closure is set to zero and slip occurs to ensure zero stress between the fault surfaces). In this case the line and column corresponding to the component of known slip is subtracted from equation 1 and an appropriate line added to equation 2.

Influence coefficients relate stress at the  $i$ th element to displacement between the faces of the  $j$ th element. In equation 1 they must be chosen appropriately according to whether the corresponding  $b_x^i$  refers to a displacement or a stress. They are derived from the solutions for a dislocation in an elastic medium. In equation 2 where the  $\beta_x^i$  fall in lines that calculate displacements in equation 1 (i.e.  $b_x^i = u_x^i$ ) the  $C_{xy}^{ij} = 0$ .

When the  $\beta$ 's have been calculated from all the fixed elements (faults or other structures where normal and/or tangential relative displacement is known), the appropriate displacements or stresses are specified for the other elements and the influence coefficients are calculated. There are the  $2N$  equations minus the number of rows and columns deleted and these can be solved for the same number of unknown values of  $D$ . Once the  $D$ 's are known, it is straightforward to calculate stresses strains or displacements anywhere in the medium as the sum of the effects of the slips ( $D$ 's and  $B$ s) on all the elements.

In the modelling in this paper, elements are specified by spatial coordinates whose relation to geographical co-ordinates can be found from the appropriate figures. Elements with fixed slip (i.e.  $b_x^i = u_x^i$ ) on one side of the element are used to describe distant plate boundaries and it is this displacement rather than the displacement between the element faces that is provided in the tables. By the convention of the program these displacements must be on the left side of the element determined by the order in which

the end coordinates are specified. Some faults or structures have both normal and tangential relative slips fixed and in other cases one or both of these are left free slipping ( $\sigma_z^i = 0$ ). Calculated displacement values are identified in the tables by being enclosed by brackets.

## Tables

TABLE 1: FAULTS USED IN DOLIANA BASIN MODELLING (see Figure 6)

The Doliana Basin is modelled by an elastic plate. Plate thickness is arbitrary since we are concerned with identifying regions of uplift and subsidence and not with assessing absolute amplitudes (See Bilham and King [1989] for a discussion). The identified active structures are modelled by boundary elements with specified or calculated displacements in the horizontal plane only (see Figure 3g). Thus uplift and subsidence predicted is only that which is a result of motion on structures that have not been explicitly included (i.e. secondary structures). The relation between the grid coordinates, geographical coordinates and the features being modelled can be found in Figure 6. Some boundary elements, such as those that apply the distant displacement boundary conditions or that extend major structures to prevent termination strains cannot be shown at the scale of the figure but their location can be recovered using information in the table.

In the table the first two boundary elements represent plate motion and the 'along' (boundary parallel) and 'normal' motions are the distant plate displacements (equal and opposite displacements for the two plates. See conventions if this seems confusing). The remaining elements represent faults and the slips are relative slip between the fault faces. The relative motion between Ionia and Europe is later estimated to be 16 mm/yr (see Table 6) which corresponds to a total amplitude applied between 'Boundary west' and 'Boundary east' of 0.175 units. Thus multiplying displacements in the table by 100 gives approximate rates in millimetres per year.

Coordinates of boundary elements and slip components:

| Fault name        | Letter on<br>Figure 6a | -----Grid coordinates----- |       |       |       | -components- |        | N <sup>o</sup> of<br>Segments |
|-------------------|------------------------|----------------------------|-------|-------|-------|--------------|--------|-------------------------------|
|                   |                        | X1                         | Y1    | X2    | Y2    | along        | normal |                               |
| Boundary west     |                        | +695                       | +560  | +1150 | +1536 | +0.045       | -0.075 | 1                             |
| Boundary east     |                        | +1310                      | +1480 | +855  | +504  | +0.045       | -0.075 | 1                             |
| Doliana west      | A                      | +981                       | +998  | +1001 | +999  | [-0.171]     | 0.000  | 1                             |
| Doliana east      | B                      | +1001                      | +999  | +1058 | +1002 | [<-0.002]    | 0.000  | 3                             |
| Kasidiaries N s/s | C                      | +1001                      | +999  | +1017 | +1034 | -0.075       | 0.000  | 1                             |
| Kasidiaries S s/s | D                      | +1017                      | +1034 | +1026 | +1053 | -0.083       | 0.000  | 1                             |
| Kasidiaries d/s   | E                      | +1001                      | +999  | +1026 | +1053 | 0.000        | +0.150 | 1                             |
| Soulopoulou       | F                      | +1026                      | +1053 | +1029 | +1053 | [-0.173]     | 0.000  | 1                             |
| Kourenton s/s     | G                      | +1029                      | +1053 | +1250 | +1527 | -0.090       | 0.000  | 1                             |
| Kourenton d/s     | H                      | +1029                      | +1053 | +1250 | +1527 | 0.000        | +0.150 | 1                             |
| Chrysodouli ext.  | I                      | +770                       | +545  | +981  | +998  | -0.090       | +0.150 | 1                             |

Conventions:

Left lateral and normal dip-slip components are negative; right lateral and thrust are positive. For the boundary elements the sense of motion refers to looking across the boundary into the region being deformed which is the left-hand side of the line drawn between the element ends. Bracketed figures are calculated by the program; unbracketed are input.

Fault orientations and the orientation and rate of the associated slip:

(The vector rate is given as a fraction of the applied plate rate.)

| Fault name        |     | Fault angle<br>to grid N | Qty<br>along | Qty<br>normal | Vector<br>angle | Vector<br>rate |
|-------------------|-----|--------------------------|--------------|---------------|-----------------|----------------|
| Doliana west      | A   | -87.1                    | -0.171       | 0.000         | 272.9           | 0.977          |
| Doliana east      | B   | -87.0                    | -0.002       | 0.000         | 273.0           | 0.001          |
| Kasidiaries N s/s | C   | -24.6                    | -0.075       | 0.000         | 335.4           | 0.428          |
| Kasidiaries S s/s | D   | -25.3                    | -0.083       | 0.000         | 334.7           | 0.474          |
| Kasidiaries d/s   | E   | -24.8                    | 0.000        | 0.150         | 245.2           | 0.857          |
| Soulopoulou       | F   | -90.0                    | -0.173       | 0.000         | 270.0           | 0.989          |
| Kourenton         | G&H | -25.0                    | -0.090       | 0.150         | 276.0           | 1.000          |
| Chrysodouli       | I   | -25.0                    | -0.090       | 0.150         | 276.0           | 1.000          |

TABLE 2

## FAULTS USED IN EPIRUS-WIDE MODELLING (see figures 4 and 11)

The Epirus is modelled by an elastic plate. Plate thickness is arbitrary since we are concerned with identifying regions of uplift and subsidence and not with assessing absolute amplitudes (See Bilham and King [1989] for a discussion). The identified active structures are modelled by boundary elements with specified or calculated displacements in the horizontal plane only (see Figure 3g). Thus uplift and subsidence predicted is only that which is a result of motion on structures that have not been explicitly included (i.e. secondary structures). The relation between the grid coordinates, geographical coordinates and the features being modelled can be found in Figure 9. Some boundary elements, such as those that apply the distant displacement boundary conditions or that extend major structures to prevent termination strains cannot be shown at the scale of the figure but their location can be recovered using information in the table. In the table the first two boundary elements represent plate motion and the 'along' (boundary parallel) and 'normal' motions are the distant plate displacements (the eastern plate is fixed). The remaining elements represent faults and the slips are relative slip between the fault faces. The relative motion between Ionia and Europe is later estimated to be 16 mm/yr (see Table 6) which corresponds to a total amplitude applied between 'Boundary west' and 'Boundary east' of 0.2 units. Thus multiplying displacements in the table by 80 gives approximate rates in millimetres per year.

| Fault name         | Letter on<br>Figure 9 | -----Grid coordinates----- |        |        |        | -components- |         | N <sup>o</sup> of<br>Segments |
|--------------------|-----------------------|----------------------------|--------|--------|--------|--------------|---------|-------------------------------|
|                    |                       | X1                         | Y1     | X2     | Y2     | along        | normal  |                               |
| Boundary west      |                       | -20.00                     | -15.00 | +29.00 | +68.00 | +0.122       | -0.158  | 1                             |
| Boundary east      |                       | +51.00                     | +58.00 | +2.00  | -25.00 | 0.000        | 0.000   | 1                             |
| Doliana            | A                     | +9.50                      | +16.35 | +13.55 | +16.80 | [-0.072]     | 0.000   | 3                             |
|                    |                       |                            |        |        |        | [-0.014]     | 0.000   |                               |
|                    |                       |                            |        |        |        | [-0.010]     | 0.000   |                               |
| Episkopou          | B                     | +13.55                     | +16.80 | +15.60 | +14.85 | +0.025       | +0.015  | 1                             |
| Kasidiaries NE     | C                     | +11.20                     | +16.55 | +12.35 | +19.00 | -0.020       | 0.000   | 1                             |
| Kasidiaries SE     | D                     | +12.35                     | +19.00 | +12.90 | +20.40 | -0.040       | 0.000   | 1                             |
| Kasidiaries W      | E                     | +10.90                     | +16.50 | +12.65 | +20.30 | 0.000        | +0.040  | 1                             |
| Soulopoulou        | F                     | +12.90                     | +20.40 | +13.50 | +21.00 | [-0.051      | +0.040] | 1                             |
| Kourenton E        | G                     | +13.50                     | +21.00 | +15.10 | +23.90 | -0.060       | 0.000   | 1                             |
| Kourenton W        | H                     | +13.20                     | +21.00 | +14.40 | +23.75 | 0.000        | +0.040  | 1                             |
| Chrysodouli        | I                     | -0.15                      | +1.45  | +9.50  | +16.35 | -0.055       | +0.070  | 1                             |
| Mitsikeli          | J                     | +13.55                     | +16.80 | +18.70 | +21.50 | -0.030       | +0.010  | 1                             |
| Psina              | K                     | +14.40                     | +23.75 | +15.50 | +24.00 | [-0.027      | +0.047] | 2                             |
|                    |                       |                            |        |        |        | [-0.067      | -0.015] |                               |
| Tomaros E          | L                     | +15.50                     | +24.00 | +17.00 | +25.60 | -0.060       | 0.000   | 1                             |
| Tomaros W          | M                     | +15.00                     | +24.40 | +16.20 | +26.50 | 0.000        | +0.060  | 1                             |
| Tomaros S          | N                     | +16.20                     | +26.50 | +17.00 | +25.60 | 0.000        | +0.060  | 1                             |
| Ag. Kyriaki E      | O                     | +12.70                     | +25.50 | +16.20 | +26.50 | -0.060       | 0.000   | 1                             |
| Ag. Kyriaki W      | P                     | +10.10                     | +26.25 | +12.70 | +25.50 | [-0.006]     | 0.000   | 2                             |
|                    |                       |                            |        |        |        | [-0.050]     | 0.000   |                               |
| Derviziana N       | Q                     | +16.20                     | +26.50 | +16.60 | +27.30 | -0.050       | +0.120  | 1                             |
| Derviziana S       | R                     | +16.60                     | +27.30 | +16.30 | +28.30 | 0.000        | +0.100  | 1                             |
| Pente Dendra ext.  | S                     | +16.30                     | +28.30 | +23.96 | +50.00 | -0.056       | +0.121  | 1                             |
| Paramythia N ext.  | T                     | -0.15                      | +1.45  | +11.70 | +25.80 | -0.066       | +0.075  | 1                             |
| Paramythia South 1 | U                     | +11.70                     | +25.80 | +12.25 | +26.65 | -0.010       | +0.035  | 1                             |

|                    |   |        |        |        |        |        |        |   |
|--------------------|---|--------|--------|--------|--------|--------|--------|---|
| Paramythia South 2 | V | +12.25 | +26.65 | +13.20 | +29.50 | -0.020 | +0.040 | 1 |
| Souli              | W | +13.70 | +28.20 | +14.55 | +30.10 | -0.020 | +0.020 | 1 |
| Tourli             | X | +13.35 | +29.90 | +13.50 | +31.00 | -0.010 | +0.020 | 1 |
| Thesprotika North  | Y | +15.70 | +28.45 | +14.85 | +30.75 | 0.000  | +0.050 | 1 |
| Thesprotika S ext. | Z | +14.85 | +30.75 | +20.74 | +50.00 | -0.027 | +0.061 | 1 |

Conventions:

Left lateral and normal dip-slip components are negative; right lateral and thrust are positive. For the boundary elements the sense of motion refers to looking accross the boundary into the region being deformed which is the left-hand side of the line drawn between the element ends. Bracketed figures are calculated by the program; unbracketed are input. Where an element is shown to have more than one segment it is split into the indicated number of separate boundary elements on a straight line between the assigned coordinates. The values of slip calculated for the elements are provided with the uppermost corresponding to the (X1,Y1) end and the lowermost to the (X2,Y2) end.

TABLE 3  
FAULT SLIP VECTORS USED IN EPIRUS-WIDE MODELLING

Fault orientations and the orientation and rate of associated slip:

| Fault name         | Fault angle<br>to grid N | Qty<br>along | Qty<br>normal | Vector<br>angle | Vector<br>rate |
|--------------------|--------------------------|--------------|---------------|-----------------|----------------|
| Boundary west      | -30.6                    | +0.122       | -0.158        | 277.1           | 0.200          |
| Doliana            | A1 -84.0                 | [-0.072]     | 0.000         | 276.0           | 0.072          |
|                    | A2                       | [-0.014]     | 0.000         | 276.0           | 0.014          |
|                    | A3                       | [-0.010]     | 0.000         | 276.0           | 0.010          |
| Episkopou          | B +46.0                  | +0.025       | 0.015         | 257.0           | 0.029          |
| Kasidiaries NE     | C -25.0                  | -0.020       | 0.000         | 335.0           | 0.020          |
| Kasidiaries SE     | D -21.0                  | -0.040       | 0.000         | 339.0           | 0.040          |
| Kasidiaries W      | E -25.0                  | 0.000        | 0.040         | 245.0           | 0.040          |
| Soulopoulou        | F -45.0                  | [-0.051      | +0.040]       | 276.9           | 0.065          |
| Kourenton E        | G -29.0                  | -0.060       | 0.000         | 331.0           | 0.060          |
| Kourenton W        | H -24.0                  | 0.000        | 0.040         | 246.0           | 0.040          |
| Chrysodouli        | I -33.0                  | -0.055       | 0.070         | 275.2           | 0.089          |
| Mitsikeli          | J -48.0                  | -0.030       | 0.010         | 293.6           | 0.032          |
| Psina              | K1 -77.0                 | [-0.027      | +0.047]       | 222.9           | 0.054          |
|                    | K2                       | [-0.067      | -0.015]       | 295.6           | 0.069          |
| Tomaros E          | L -43.0                  | -0.060       | 0.000         | 317.0           | 0.060          |
| Tomaros W          | M -30.0                  | 0.000        | 0.060         | 240.0           | 0.060          |
| Tomaros S          | N +42.0                  | 0.000        | 0.060         | 318.0           | 0.060          |
| Ag. Kyriaki E      | O -74.0                  | -0.060       | 0.000         | 286.0           | 0.060          |
| Ag. Kyriaki W      | P1 +74.0                 | [-0.006]     | 0.000         | 256.0           | 0.006          |
|                    | P2                       | [-0.050]     | 0.000         | 256.0           | 0.050          |
| Derviziana N       | Q -27.0                  | -0.050       | 0.120         | 265.6           | 0.130          |
| Derviziana S       | R +17.0                  | 0.000        | 0.100         | 287.0           | 0.100          |
| Pente Dendra extn  | S -19.0                  | -0.056       | 0.121         | 275.8           | 0.133          |
| Paramythia N extn  | T -26.0                  | -0.066       | 0.075         | 285.3           | 0.100          |
| Paramythia S1      | U -33.0                  | -0.010       | 0.035         | 252.9           | 0.036          |
| Paramythia S2      | V -18.0                  | -0.020       | 0.040         | 278.6           | 0.045          |
| Souli              | W -24.0                  | -0.020       | 0.020         | 291.0           | 0.028          |
| Tourli             | X -8.0                   | -0.010       | 0.020         | 288.6           | 0.022          |
| Thesprotika N      | Y +20.0                  | 0.000        | 0.050         | 290.0           | 0.050          |
| Thesprotika S extn | Z -17.0                  | -0.027       | 0.061         | 276.9           | 0.067          |

Conventions:

Vector angle is expressed in degrees relative to grid north. Left lateral and normal dip-slip components are negative; right lateral and thrust are positive. For the boundary elements the sense of motion refers to looking across the boundary into the region being studied. Rates are expressed in displacement per unit time. Multiplying the figures listed by 80 gives the approximate rates for Epirus in mm/yr. Bracketed figures are calculated by the program; unbracketed are input.



TABLE 4

VECTORS SUMMED FOR TRANSECTS ACROSS EPIRUS (using data from Table 3)

| #  | -----Transect-----                                     | --Summed Vector--<br>Angle | rate  |
|----|--------------------------------------------------------|----------------------------|-------|
| 1  | Paramythia NX [T] - Chrysodouli [I] - Episkopou [B]    | 277.5                      | 0.215 |
| 2  | Paramythia NX [T] - Kasidiaries [C,E] - Mitsikeli [J]  | 283.3                      | 0.175 |
| 3  | Paramythia NX [T] - Kasidiaries [C,E] - Doliana [A2]   | 280.6                      | 0.158 |
| 4  | Paramythia NX [T] - Kasidiaries [D,E] - Doliana [A3]   | 287.0                      | 0.164 |
| 5  | Paramythia NX [T] - Kourenton [G,H]                    | 291.3                      | 0.174 |
| 6  | Paramythia S1 [U] - Ag. Kyriaki [O] - Tomaros [L,M]    | 276.1                      | 0.186 |
| 7  | Paramythia S2 [V] - Ag. Kyriaki [O] - Mitsikeli [K2,J] | 288.5                      | 0.205 |
| 8  | Paramythia S2 [V] - Derviziana N [Q]                   | 270.0                      | 0.174 |
| 9  | Paramythia S2 [V] - Souli [W] - Pente Dendra [S]       | 278.5                      | 0.205 |
| 10 | Tourli [X] - Thesprotika N [Y] - Pente Dendra [S]      | 280.6                      | 0.204 |
| 11 | Thesprotika SX [Z] - Pente Dendra SX [S]               | 276.2                      | 0.200 |

## Conventions:

Vector angle is expressed relative to grid North. Rates are expressed in displacement per unit time: for order of magnitude, multiplying the figures listed by approximately 80 would give mm/yr.

TABLE 5  
POLES OF ROTATION AND THEIR ANGULAR VELOCITY

| Pole            | Latitude | Longitude | Power (rad/yr)        |
|-----------------|----------|-----------|-----------------------|
| Iblean/African  | 40° 40'  | 16° 20'   | 3.3 10 <sup>-8</sup>  |
| Aegean/African  | 38° 40'  | 16° 00'   | 9.8 10 <sup>-8</sup>  |
| Ionian/African  | 44° 50'  | 25° 20'   | 3.0 10 <sup>-8</sup>  |
| Ionian/European | 44° 30'  | 21° 20'   | 2.83 10 <sup>-8</sup> |
| Ionian/Aegean   | 40° 12'  | 18° 12'   | 13.0 10 <sup>-8</sup> |
| Aegean/European | 39° 00'  | 17° 15'   | 10.2 10 <sup>-8</sup> |

TABLE 6  
SOME RELATIVE RATES OF MOTION (derived from Figure 15)

| Relative motion | Location                            | Rate (mm/yr) |
|-----------------|-------------------------------------|--------------|
| Iblean/African  | Malta/Sicily escarpment - south end | 18           |
| Ionian/African  | Malta/Sicily escarpment - south end | 36           |
| Aegean/African  | Strabo south end                    | 93           |
| Aegean/Ionian   | Strabo south end                    | 115          |
| Aegean/Ionian   | Gulf of Arta - Preveza              | 31           |
| Ionian/European | Gulf of Arta - Preveza              | 16           |
| Aegean/European | Gulf of Arta - Preveza              | 26           |

TABLE 7

FAULTS USED IN THE MODELLING OF THE GULF OF ARTA (see Figures 17,18 and 19)

The Gulf of Arta is modelled by an elastic plate. Plate thickness is arbitrary since we are concerned with identifying regions of uplift and subsidence and not with assessing absolute amplitudes (See Bilham and King [1989] for a discussion). The identified active structures are modelled by boundary elements with specified or calculated displacements in the horizontal plane only (see Figure 3g). Thus uplift and subsidence predicted is only that which is a result of motion on structures that have not been explicitly included (i.e. secondary structures). The relation between the grid coordinates, geographical coordinates and the features being modelled can be found in Figure 17. Some boundary elements that extend major structures to prevent termination strains cannot be shown at the scale of the figure but their location can be recovered using information in the table.

In the table the elements represent faults and the slips are relative slip between the fault faces. The relative motions on the last five elements are those for Prevesa taken from Table 6) Levkas North and West both carry the Aegean/Ionian motion. The Souli/Thesprotika and Pente Dendra structures equally share the Ionian/European motion and the Aetolia structure carries all of the Aegean/European motion. Multiplying displacements in the table by 100 gives rates in millimetres per year.

| Fault name        | Letter on<br>Figure 20 | -----Grid coordinates----- |       |       |       | -components-                |                              | Nº of<br>Segments |
|-------------------|------------------------|----------------------------|-------|-------|-------|-----------------------------|------------------------------|-------------------|
|                   |                        | X1                         | Y1    | X2    | Y2    | along                       | normal                       |                   |
| Loutraki          | A                      | 18.85                      | 38.20 | 21.60 | 40.15 | [+0.075<br>+0.227<br>+0.175 | [-0.076<br>-0.139<br>-0.151] | 3                 |
| Thyrrion          | B                      | 17.90                      | 40.80 | 20.10 | 39.10 | [+0.035<br>+0.027<br>+0.021 | [-0.006<br>+0.017<br>+0.059] | 3                 |
| Serekas           | C                      | 17.90                      | 40.80 | 19.15 | 44.20 | [+0.019<br>+0.014<br>+0.008 | [+0.029<br>+0.013<br>+0.003] | 3                 |
| Zalongon          | D                      | 13.85                      | 33.15 | 15.45 | 32.70 | [+0.103]                    | 0.000                        | 1                 |
| Stavros           | E                      | 15.45                      | 32.70 | 16.40 | 32.45 | [+0.033]                    | 0.000                        | 1                 |
| Ziros             | F                      | 16.40                      | 32.45 | 17.45 | 31.10 | [+0.052]                    | 0.000                        | 1                 |
| Arta              | G                      | 19.60                      | 32.40 | 22.70 | 36.30 | [-0.052<br>-0.060<br>-0.055 | [-0.069<br>-0.100<br>-0.094] | 3                 |
| Amvracia          | H                      | 21.60                      | 40.15 | 24.00 | 43.80 | [+0.092<br>+0.088<br>+0.063 | [-0.219<br>-0.266<br>-0.252] | 3                 |
| Amphilochia       | J                      | 22.70                      | 36.30 | 24.00 | 43.80 | [-0.088<br>-0.115<br>-0.168 | [-0.012<br>+0.075<br>+0.155] | 3                 |
| Preveza           | K                      | 13.85                      | 33.15 | 15.80 | 37.70 | [+0.035<br>+0.065<br>+0.094 | [+0.131<br>+0.153<br>+0.187] | 3                 |
| Levkas North      | L                      | 14.40                      | 39.40 | 15.80 | 37.70 | +0.310                      | 0.000                        | 1                 |
| Levkas West       | M                      | 14.40                      | 39.40 | 0.00  | 68.80 | +0.300                      | +0.075                       | 1                 |
| Souli/Thesprotika | N                      | 5.83                       | 3.00  | 15.45 | 32.70 | -0.031                      | +0.074                       | 1                 |
| Pente Dendra      | P                      | 8.23                       | 3.00  | 17.45 | 31.10 | -0.031                      | +0.074                       | 1                 |
| Aetolia           | Q                      | 24.00                      | 43.80 | 35.29 | 70.00 | -0.217                      | -0.136                       | 1                 |

Conventions:

Vector angle is expressed in degrees relative to grid north. Left lateral and normal dip-slip components are negative; right lateral and thrust are positive. Where an element is shown to have more than one segment it is split into the indicated number of separate boundary elements on a straight line between the assigned coordinates. The values of slip calculated for the elements are provided with the uppermost corresponding to the (X1,Y1) end and the lowermost to the (X2,Y2) end. Bracketed figures are calculated by the program; unbracketed are input.

TABLE 8

## FAULT VECTORS USED IN THE GULF OF ARTA MODELLING

Fault orientations and the orientation and rate of the associated slip

| Fault name        |    | Fault angle<br>to grid N | Qty along | Qty normal | Vector<br>angle | Vector<br>rate |
|-------------------|----|--------------------------|-----------|------------|-----------------|----------------|
| Loutraki          | A1 | -54.7                    | [0.075    | -0.076]    | 79.9            | 0.107          |
| Loutraki          | A2 | -54.7                    | [0.227    | -0.139]    | 93.8            | 0.266          |
| Loutraki          | A3 | -54.7                    | [0.175    | -0.151]    | 84.5            | 0.231          |
| Thyrion           | B1 | +52.3                    | [0.035    | -0.006]    | 222.6           | 0.036          |
| Thyrion           | B2 | +52.3                    | [0.027    | 0.017]     | 264.5           | 0.032          |
| Thyrion           | B3 | +52.3                    | [0.021    | 0.059]     | 302.7           | 0.063          |
| Serekas           | C1 | -20.2                    | [0.019    | 0.029]     | 216.6           | 0.035          |
| Serekas           | C2 | -20.2                    | [0.014    | 0.013]     | 202.7           | 0.019          |
| Serekas           | C3 | -20.2                    | [0.008    | 0.003]     | 180.4           | 0.009          |
| Zalongon          | D  | +74.3                    | [0.103    | 0.000]     | 74.3            | 0.103          |
| Stavros           | E  | +75.3                    | [0.033    | 0.000]     | 75.3            | 0.033          |
| Ziros             | F  | +37.9                    | [0.052    | 0.000]     | 37.9            | 0.052          |
| Arta              | G1 | -38.5                    | [-0.052   | -0.069]    | 14.5            | 0.086          |
| Arta              | G2 | -38.5                    | [-0.060   | -0.100]    | 20.5            | 0.117          |
| Arta              | G3 | -38.5                    | [-0.055   | -0.094]    | 21.2            | 0.109          |
| Amvracia          | H1 | -33.3                    | [0.092    | -0.219]    | 79.5            | 0.238          |
| Amvracia          | H2 | -33.3                    | [0.088    | -0.266]    | 75.0            | 0.280          |
| Amvracia          | H3 | -33.3                    | [0.063    | -0.252]    | 70.7            | 0.260          |
| Amphilochia       | J1 | -9.8                     | [-0.088   | -0.012]    | 358.0           | 0.089          |
| Amphilochia       | J2 | -9.8                     | [-0.155   | 0.075]     | 324.4           | 0.172          |
| Amphilochia       | J3 | -9.8                     | [-0.168   | 0.155]     | 307.5           | 0.229          |
| Preveza           | K1 | -23.2                    | [0.035    | 0.131]     | 231.8           | 0.136          |
| Preveza           | K2 | -23.2                    | [0.065    | 0.153]     | 223.8           | 0.166          |
| Preveza           | K3 | -23.2                    | [0.094    | 0.187]     | 220.1           | 0.209          |
| Levkas North      | L  | +39.5                    | 0.310     | 0.000      | 219.5           | 0.310          |
| Levkas West       | M  | +26.1                    | 0.300     | 0.075      | 220.1           | 0.309          |
| Souli/Thesprotika | N  | -17.9                    | -0.031    | 0.074      | 274.8           | 0.080          |
| Pente Dendra      | P  | -18.2                    | -0.031    | 0.074      | 274.5           | 0.080          |
| Aetolia           | Q  | -23.3                    | -0.217    | -0.136     | 8.8             | 0.256          |

## Conventions:

Vector angle is expressed in degrees relative to grid north. Left lateral and normal dip-slip components are negative; right lateral and thrust are positive. For the boundary elements the sense of motion refers to looking across the boundary into the region being studied. Rates are expressed in displacement per unit time. Multiplying the figures listed by 100 gives rates in mm/yr. Bracketed figures are calculated by the program; unbracketed are input.
